# Supplementary material for: Insights for Sea Outfall Turbid Plume Monitoring with High-Spatial-Resolution Satellite Imagery Application in Portugal
Source: MDPI journal article supplement (doi:10.3390/rs15133368), 2023-06-30
Supplement: s1 [file s1]

Archive with 1 entries (1 files):
- remotesensing-2373757-Supplementary.pdf
